# Supplementary material for: Alginate di-aldehyde-modified metal–organic framework nanocarriers as delivery platform and adjuvant in inactivated pseudorabies vaccination
Source: Royal Society of Chemistry journal article supplement (doi:10.1039/d3mh02251j), 2024-01-01

**.Supplementary Information for:**

**Alginate di-aldehyde modified metal-organic framework nanocarriers as delivery  
and adjuvant in inactivated pseudorabies vaccination**

Wenzhu Yin,<sup>a,b,c</sup> Zeyu Xu,<sup>b</sup> Chen Chang,<sup>a</sup> Yanhong Zhao,<sup>a</sup> Haiyan Wang,<sup>a</sup> Jinqiu Zhang,<sup>a</sup> Fang Ma,<sup>a</sup> Xiaoxin

Zuo,<sup>a</sup> Bo Tang<sup>\*a,b</sup> and Yu Lu<sup>\*a,c</sup>

**Address:**

<sup>a</sup>Institute of Veterinary Immunology & Engineering, National Research Center of Engineering and Technology for Veterinary Biologicals, Jiangsu Academy of Agricultural Sciences, Nanjing 210014, China.

<sup>b</sup>College of Veterinary Medicine, Nanjing Agricultural University, Nanjing 210095, China.

<sup>c</sup>GuoTai (Taizhou) Center of Technology Innovation for Veterinary Biologicals, Taizhou 225300, China.

Table S1. List of primers of gI/gE gene of PRV used in this study.

| Primer | Sequence                                                 |
|--------|----------------------------------------------------------|
| gI/gE  | F:GGTGTTCATAATTTGTGGGTGG-3'<br>R:GAAAGGGCCGCATGGTCTCA-3' |

Table S2. The body weight changes of mice in different groups between 1 dpi and 28 dpi.

|               | Group      |            |            |            |             |            |                 |
|---------------|------------|------------|------------|------------|-------------|------------|-----------------|
|               | PBS        | PRV        | ISA201/PRV | Alum/PRV   | ZIF-7/8/PRV | ADA/PRV    | ZIF-7/8-ADA/PRV |
| <b>1 dpi</b>  | 23.19±0.97 | 23.56±0.98 | 23.13±1.30 | 22.89±1.58 | 22.81±0.83  | 23.03±1.21 | 22.98±1.05      |
| <b>7 dpi</b>  | 25.31±1.37 | 25.43±1.31 | 25.09±0.65 | 25.19±0.77 | 24.92±0.63  | 25.21±0.74 | 25.45±1.11      |
| <b>14 dpi</b> | 26.29±0.85 | 26.49±1.15 | 26.63±1.00 | 26.75±0.84 | 27.00±0.63  | 26.89±0.82 | 27.30±0.64      |
| <b>21 dpi</b> | 28.10±0.88 | 27.10±0.78 | 28.38±0.94 | 27.77±0.84 | 28.53±0.93  | 28.27±1.15 | 28.43±1.32      |
| <b>28 dpi</b> | 29.05±2.10 | 28.40±1.86 | 28.74±1.00 | 29.14±0.98 | 29.22±1.14  | 29.24±1.61 | 29.22±1.89      |

Table S3. Blood routine examination of mice in different immune groups in 7 dpi.

|                    | PBS  | PRV  | ISA201/PRV | Alum/PRV | ZIF-7/8/PRV | ADA/PRV | ZIF-7/8-ADA/PRV | Standard Range |
|--------------------|------|------|------------|----------|-------------|---------|-----------------|----------------|
| <b>Leukocyte</b>   | 8.2  | 8.69 | 7.59       | 7.54     | 6.63        | 7.21    | 7.57            | 0.8-10.6       |
| <b>Lymphocyte</b>  | 1.23 | 1.42 | 2.16       | 1.59     | 1.85        | 1.19    | 2.05            | 0.23-3.6       |
| <b>Neutrophils</b> | 0.06 | 4.48 | 1.5        | 2.46     | 6.32        | 5.52    | 4.1             | 0.6-8.9        |
| <b>Monocytes</b>   | 0.05 | 0.08 | 0.05       | 0.09     | 0.04        | 0.07    | 0.05            | 0.04-0.14      |
| <b>Oxyphil</b>     | 0.07 | 0.19 | 0.04       | 0.07     | 0.21        | 0.14    | 0.06            | 0.00-0.51      |
| <b>Basophile</b>   | 0.05 | 0.02 | 0.04       | 0.01     | 0.02        | 0.04    | 0.07            | 0.00-0.12      |
| <b>Erythrocyte</b> | 8.05 | 8.46 | 7.07       | 8.26     | 7.58        | 7.58    | 7.58            | 6.5-11.5       |
| <b>Platelet</b>    | 689  | 834  | 1439       | 857      | 735         | 924     | 984             | 400-1600       |

Table S4. Blood routine examination of mice in different immune groups in 14 dpi.

|                    | PBS  | PRV  | ISA201/PRV | Alum/PRV | ZIF-7/8/PRV | ADA/PRV | ZIF-7/8-ADA/PRV | Standard Range |
|--------------------|------|------|------------|----------|-------------|---------|-----------------|----------------|
| <b>Leukocyte</b>   | 8.2  | 8.69 | 7.59       | 7.54     | 6.63        | 7.21    | 7.57            | 0.8-10.6       |
| <b>Lymphocyte</b>  | 1.23 | 1.42 | 2.16       | 1.59     | 1.85        | 1.19    | 2.05            | 0.23-3.6       |
| <b>Neutrophils</b> | 0.06 | 4.48 | 1.5        | 2.46     | 6.32        | 5.52    | 4.1             | 0.6-8.9        |
| <b>Monocytes</b>   | 0.05 | 0.08 | 0.05       | 0.09     | 0.04        | 0.07    | 0.05            | 0.04-0.14      |
| <b>Oxyphil</b>     | 0.07 | 0.19 | 0.04       | 0.07     | 0.21        | 0.14    | 0.06            | 0.00-0.51      |
| <b>Basophile</b>   | 0.05 | 0.02 | 0.04       | 0.01     | 0.02        | 0.04    | 0.07            | 0.00-0.12      |
| <b>Erythrocyte</b> | 8.05 | 8.46 | 7.07       | 8.26     | 7.58        | 7.58    | 7.58            | 6.5-11.5       |
| <b>Platelet</b>    | 689  | 834  | 1439       | 857      | 735         | 924     | 984             | 400-1600       |

Figure S1.  $^1\text{H}$  NMR spectrum of ADA.

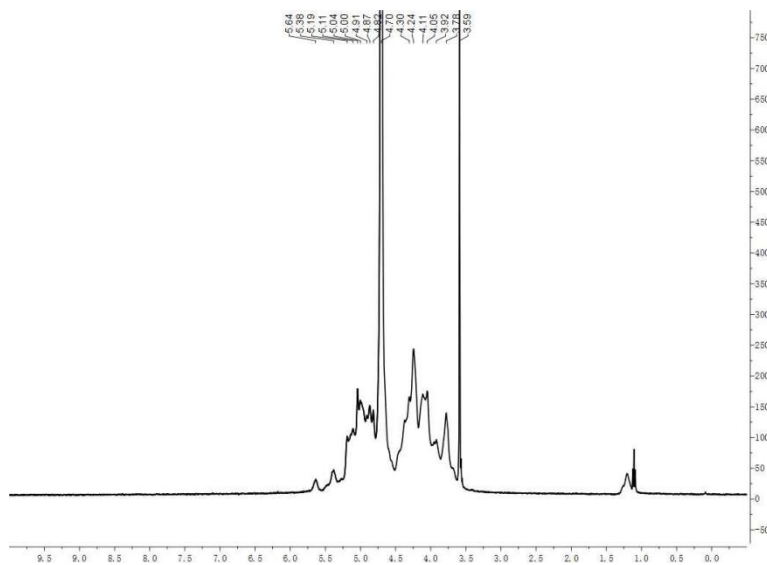

Figure S2. TEM images of (A) ZIF-7/8 and (B) ZIF-7/8-ADA.

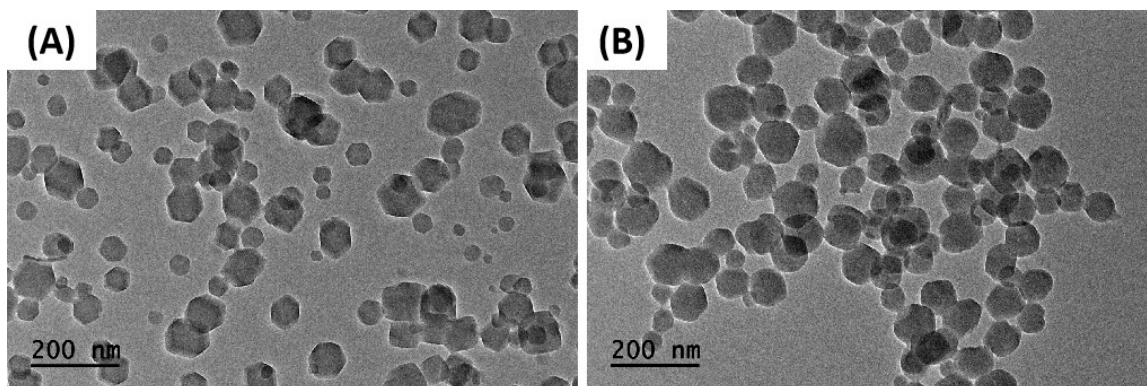

**Figure S3.** (A) XPS spectrum of ZIF-7/8 and high-resolution (B) C1s, (C) N1s, and (D) O1s XPS spectrum of ZIF-7/8-ADA.

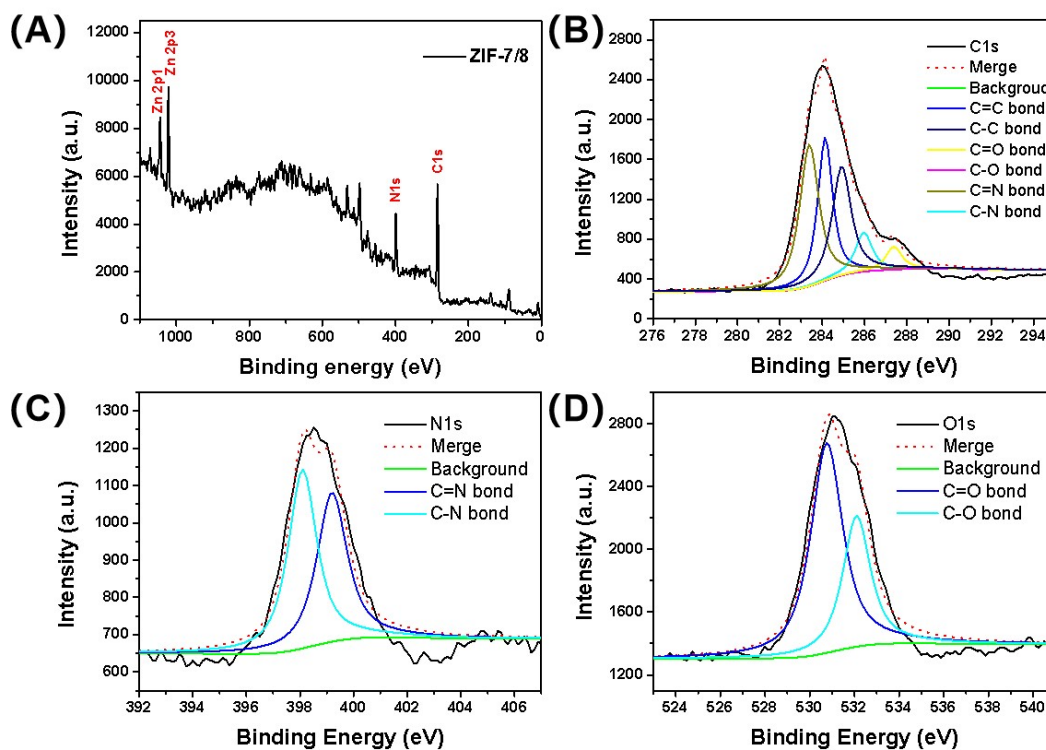

**Figure S4.** Nitrogen adsorption-desorption isotherms of ZIF-7/8. (A) BET surface area and (B) BJH pore width.

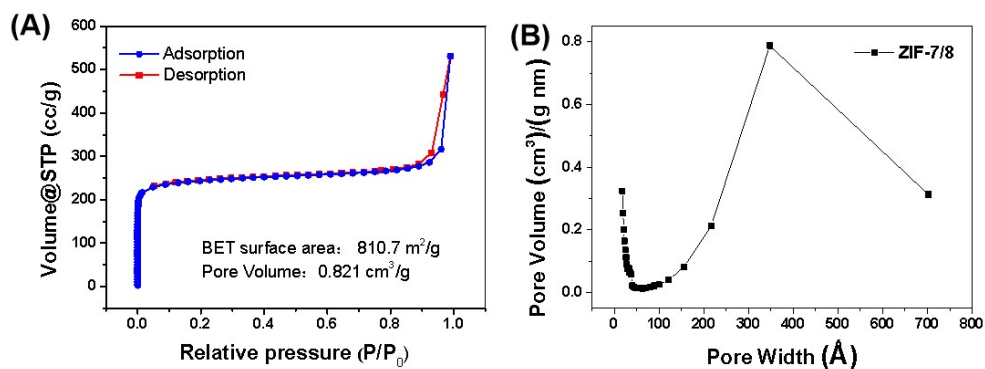

**Figure S5.** TEM images of (A) PRV, (B) ZIF-7/8/PRV and (C) ZIF-7/8-ADA/PRV.

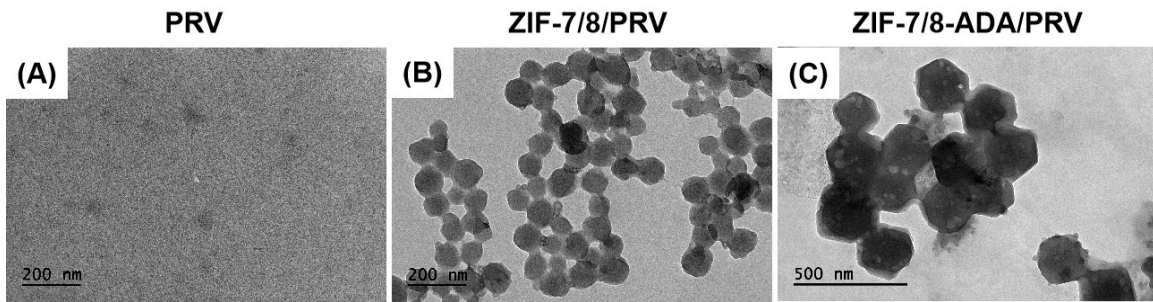

**Figure S6.** Adsorption of the inactivated PRV antigen by ZIF-7/8-ADA. (A) PRV cumulative adsorption curves of the ZIF-7/8-ADA in PBS solution with different volume ratios; (B) SDS-PAGE image of ZIF-7/8-ADA adsorbed PRV.

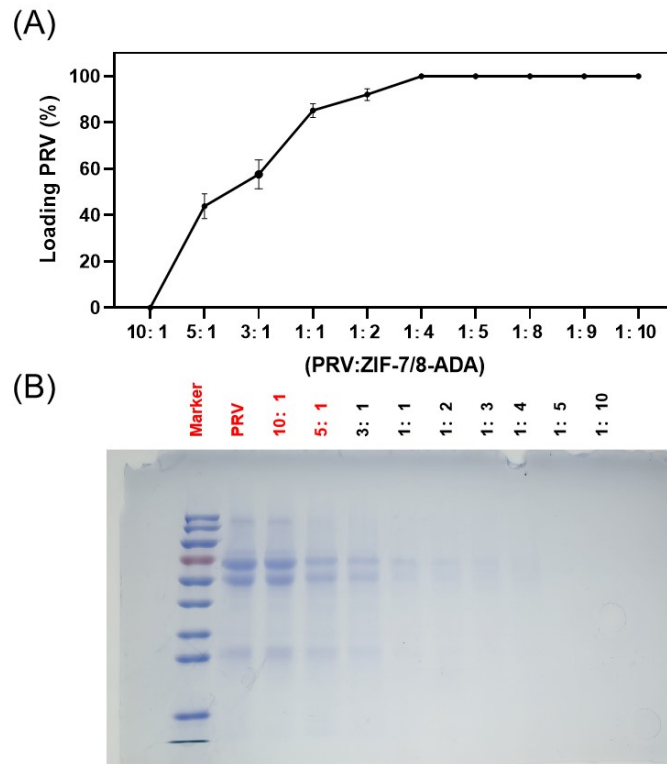

**Figure S7.** H&E staining images of major organs in ICR mice injected with different concentration of ZIF-7/8-ADA after 28 dpi. (A) 200  $\mu\text{g}/\text{mL}$  and (B) 1000  $\mu\text{g}/\text{mL}$ . Scale bars correspond to 50  $\mu\text{m}$ .

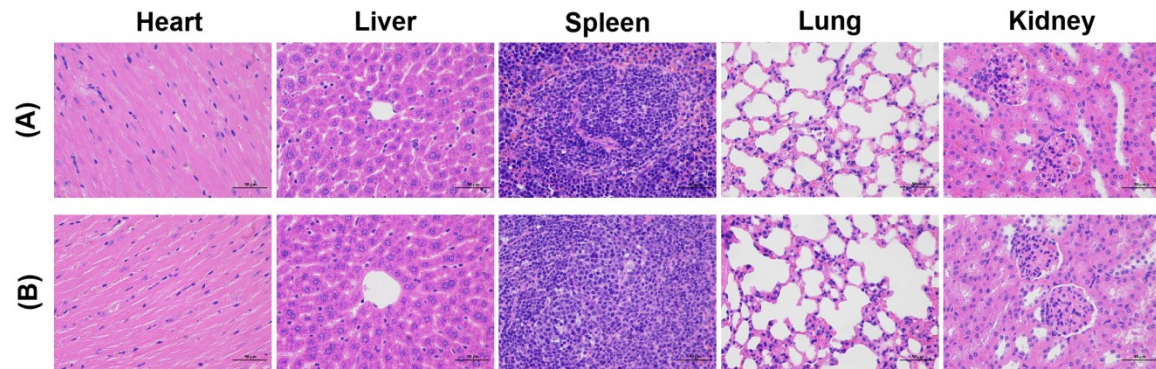

**Figure S8.** Cell uptake of ZIF-7/8-ADA by BMDCs. (A) The CLSM images of BMDCs, incubated with OVA-FITC, ZIF-7/8-ADA-RhB/OVA-FITC and ZIF-7/8-ADA-RhB for 12 h, respectively. Scale bar: 20  $\mu\text{m}$ . The mean green (B) and red (C) fluorescence intensity of OVA-FITC and ZIF-7/8-ADA-RhB/OVA-FITC and ZIF-7/8-ADA-RhB, respectively. (D) The co-localization analyst in ZIF-7/8-ADA-RhB/OVA-FITC between ZIF-7/8-ADA-RhB and OVA-FITC.

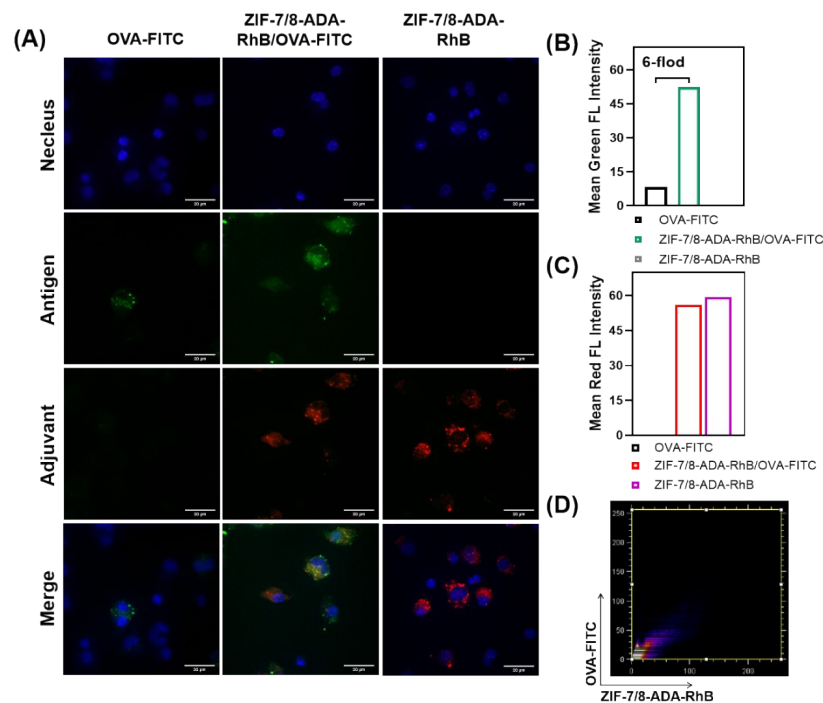



**Figure S9.** H&E staining images of major organs of surviving mice after PRV-challenged with 100LD<sub>50</sub>/mL dose. Scale bars represent 50 μm.

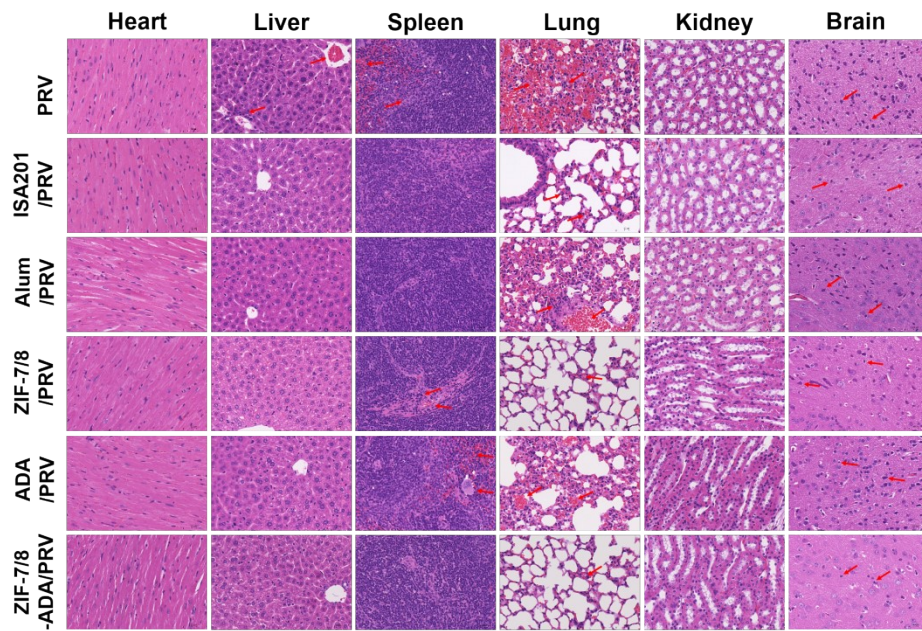



**Figure S10.** Flow cytometry analysis of CD11c<sup>+</sup>CD80<sup>+</sup>, CD11c<sup>+</sup>CD86<sup>+</sup>, CD11c<sup>+</sup>MHC-I<sup>+</sup> and CD11c<sup>+</sup>MHC-II<sup>+</sup> in BMDCs after immunized with PBS, PRV, Alum/PRV, ISA201/PRV, ZIF-7/8/PRV, ADA/PRV, and ZIF-7/8-ADA/PRV.

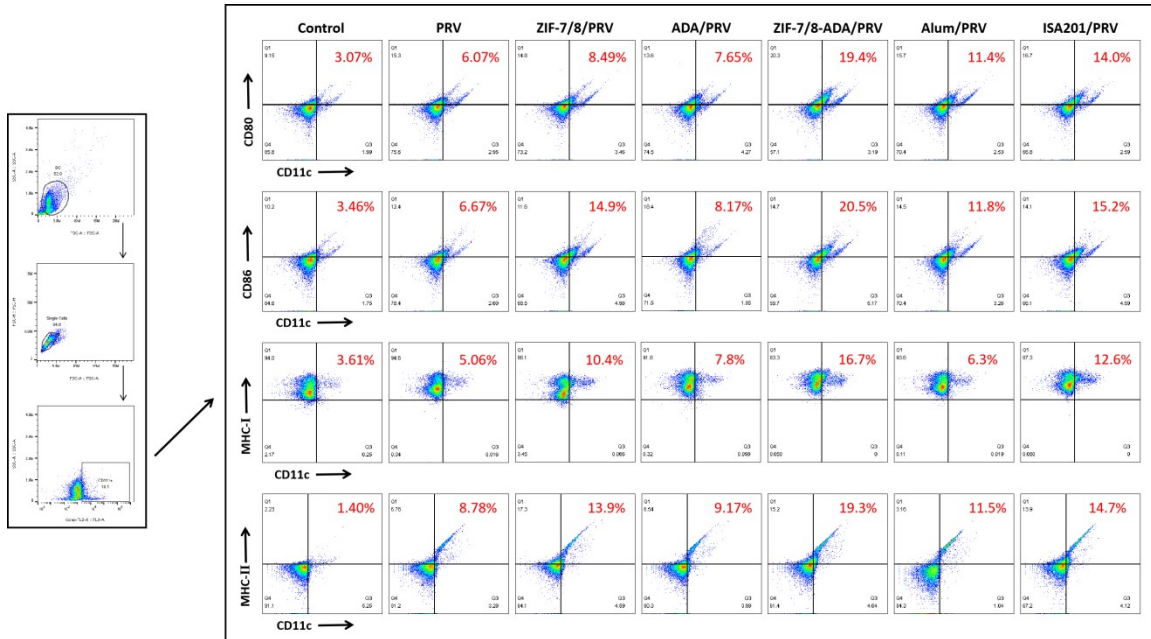

Supplement: d3mh02251j1.pdf [file d3mh02251j1.pdf]
